# Supplementary material for: MicroRNA-378 contributes to osteoarthritis by regulating chondrocyte autophagy and bone marrow mesenchymal stem cell chondrogenesis
Source: PubMed Central journal article supplement — Mol Ther Nucleic Acids. 2022 Mar 23;28:328–41. doi: 10.1016/j.omtn.2022.03.016 (PMC9010521; doi:10.1016/j.omtn.2022.03.016), 2022-03-23
Supplement: mmc1.pdf [file mmc1.pdf]

OMTN, Volume 28

## Supplemental information

**MicroRNA-378 contributes to osteoarthritis  
by regulating chondrocyte autophagy and  
bone marrow mesenchymal stem cell chondrogenesis**

**Lu Feng, Zhengmeng Yang, Yucong Li, Qi Pan, Xiaoting Zhang, Xiaomin Wu, Jessica Hiu Tung Lo, Haixing Wang, Shanshan Bai, Xuan Lu, Ming Wang, Sien Lin, Xiaohua Pan, and Gang Li**

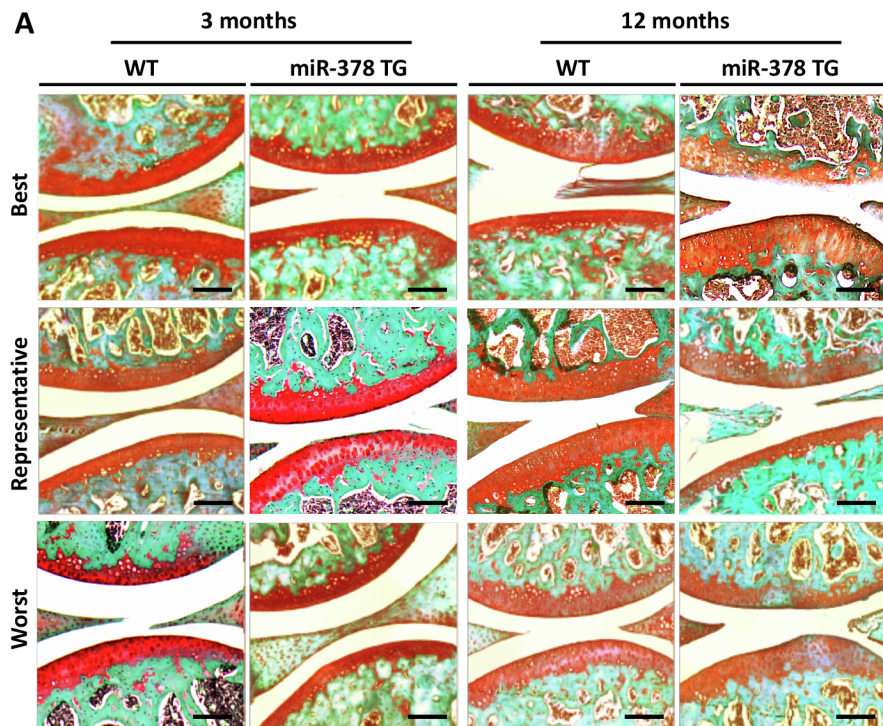

**B**

|                | WT       | miR-378 TG | WT        | miR-378 TG |
|----------------|----------|------------|-----------|------------|
|                | 3 months | 3 months   | 12 months | 12 months  |
| Best           | Stage: 0 | Stage: 0   | Stage: 0  | Stage: 2   |
|                | Grade: 0 | Grade: 0   | Grade: 0  | Grade: 1   |
|                | OARSI: 0 | OARSI: 0   | OARSI: 0  | OARSI: 2   |
| Representative | Stage: 1 | Stage: 1   | Stage: 0  | Stage: 3   |
|                | Grade: 0 | Grade: 1   | Grade: 0  | Grade: 1   |
|                | OARSI: 0 | OARSI: 1   | OARSI: 0  | OARSI: 3   |
| Worst          | Stage: 1 | Stage: 1   | Stage: 2  | Stage: 2   |
|                | Grade: 1 | Grade: 1   | Grade: 1  | Grade: 2   |
|                | OARSI: 1 | OARSI: 1   | OARSI: 1  | OARSI: 4   |

**Supplementary Figure 1. A.** The best, representative and worst results of Safranin O/fast green staining of OA mice cartilage. **B.** Semi-quantitative analysis of OA score. OA cartilage histopathology grade and stage were evaluated accordingly. OA score=grade X stage.

OA cartilage histopathology grade: Grade 0, cartilage surface intact; Grade 1, surface intact; Grade 2, surface discontinuity; Grade 3, vertical fissures; Grade 4, erosion; Grade 5, denudation; Grade 6, deformation. OA cartilage histopathology stage: Stage 0, No OA activity seen; Stage 1, <10%; Stage 2 10-25%; Stage 3, 25-50%; Stage, 4 >50%.

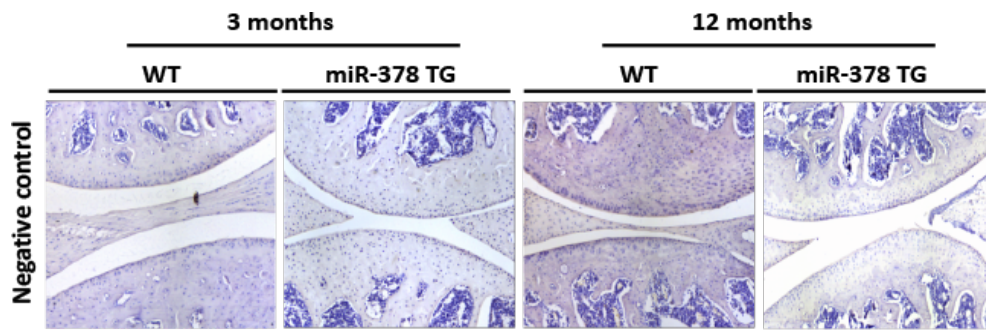

**Supplementary Figure 2.** Negative control of IHC staining of Col X and Mmp13 positive chondrocytes without primary antibodies application in articular cartilage of WT and miR-378 TG mice at the age of 3-month-old and 12-month-old at low magnitude. Sections were counterstained with hematoxylin (Scale bar=200  $\mu$ m).

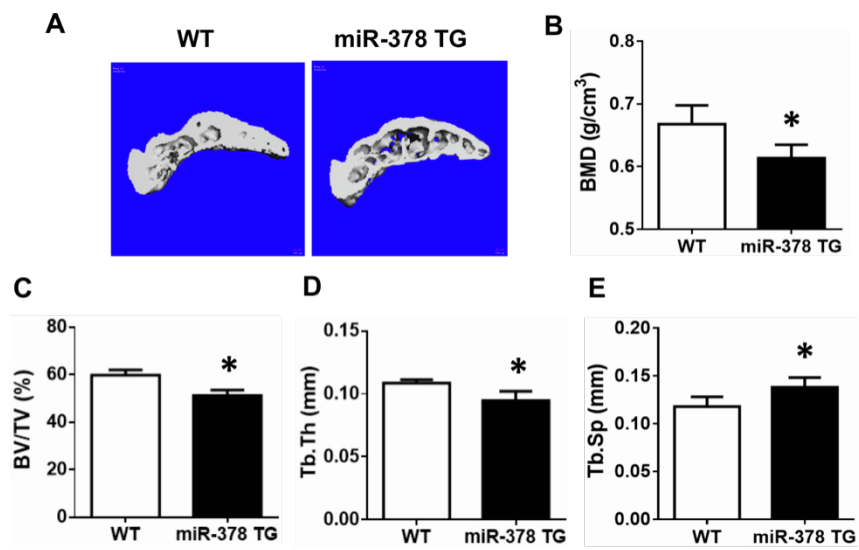

**Supplementary 3. A.** Micro-CT image reconstruction of subchondral bone in WT and miR-378 TG mice at the age of 12 months. **B-E.** The BMD (**B**), BV/TV (%) (**C**), Tb.Th (**D**) and Tb.Sp (**E**) were also evaluated (n=8, \*p<0.05).

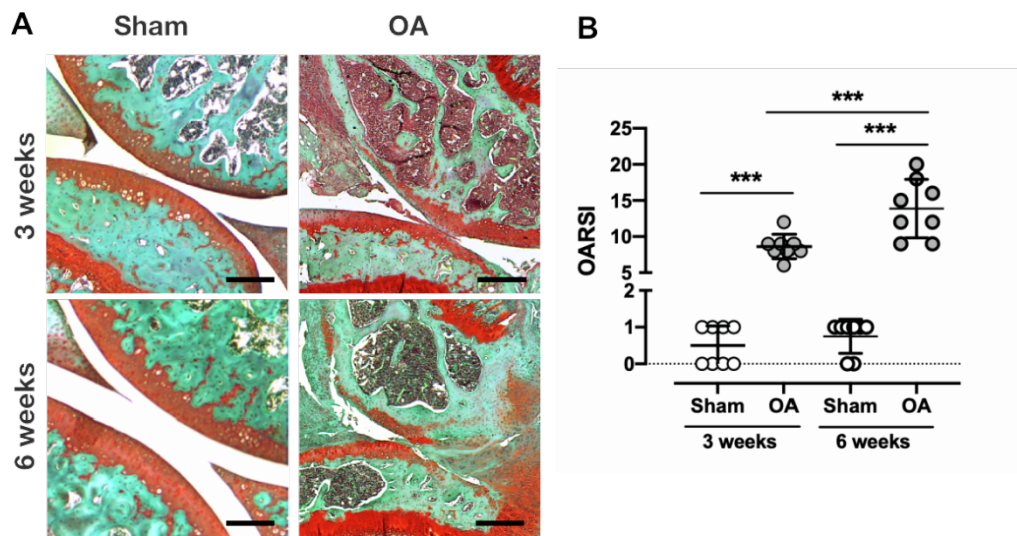

**Supplementary Figure 4. A&B.** Safranin O&fast green staining (**A**) and OARSI scores (**B**) of knee joint cartilage collected from both Sham and OA groups at week 3 and week 6 post ACLT+DMM surgery (n=8, \*\*\*p<0.001).

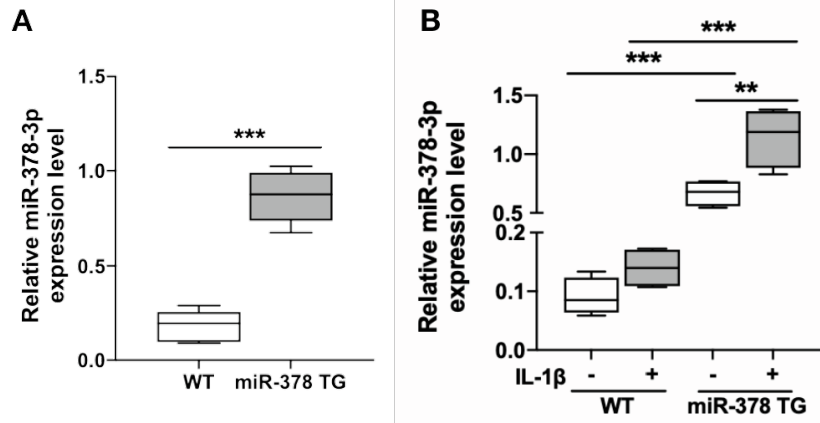

**Supplementary Figure 5. A&B.** miR-378 expression level in cartilage of WT and miR-378 TG mice (**A**) and in chondrocyte of WT and miR-378 TG mice with/without IL-1 $\beta$  treatment were studied by using Real-time PCR (**B**). The relative miRNA expression was normalized to mmu-miR-103a-3p (n=4; \*\*p<0.01, \*\*\*p<0.001).

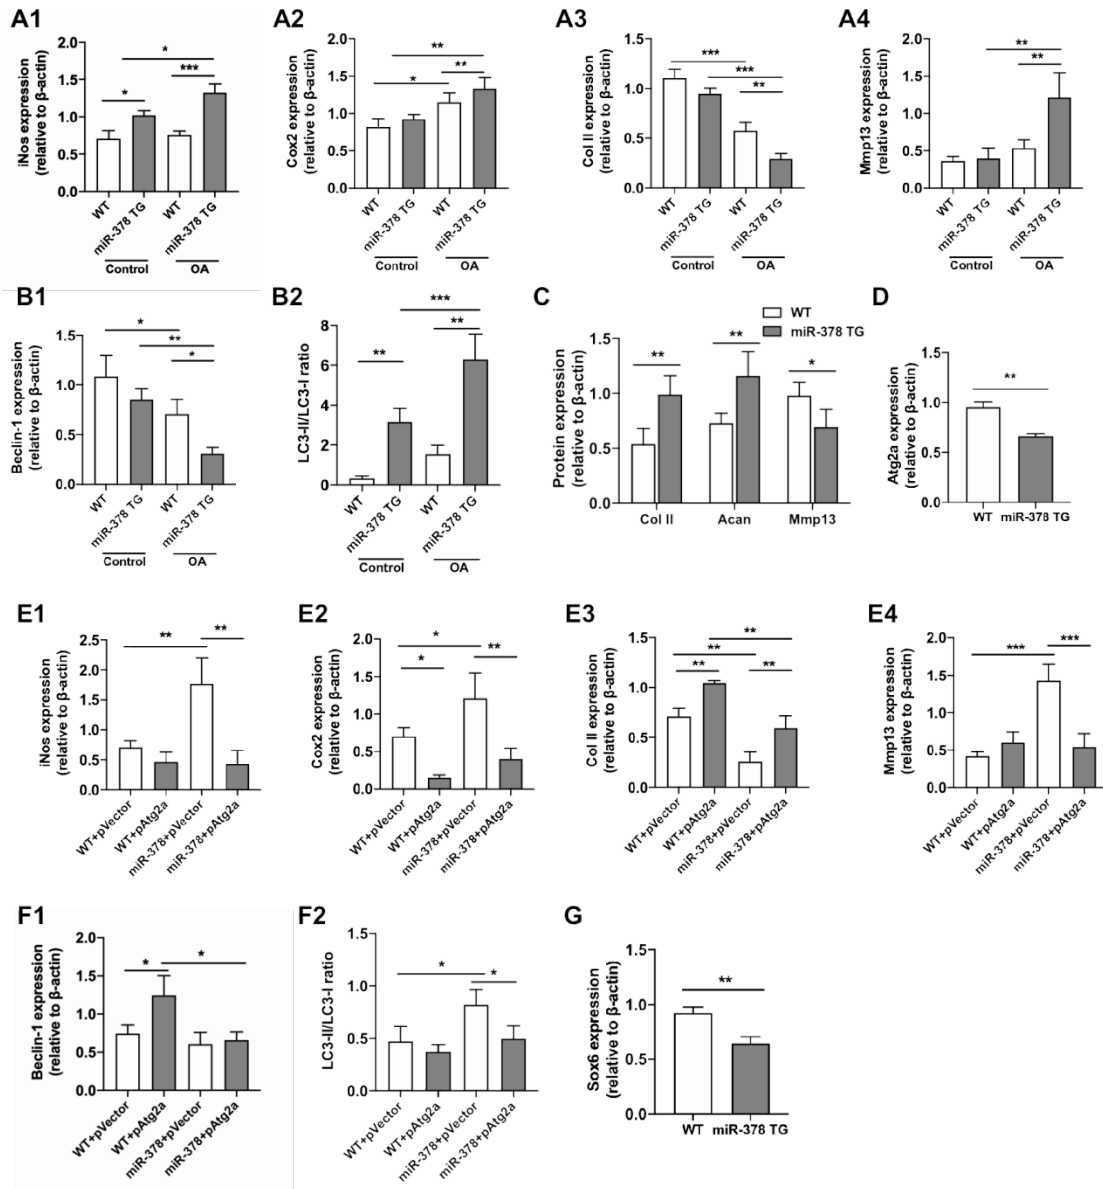

**Supplementary Figure 6. A-G.** Semi-quantitative analysis of all the Western blot bands in Figure 3F (A), 3G (B), 4G (C), 5C (D), 5I (E), 5J (F) and 6C (G) (n=3; \*p<0.05, \*\*p<0.01, \*\*\*p<0.001).

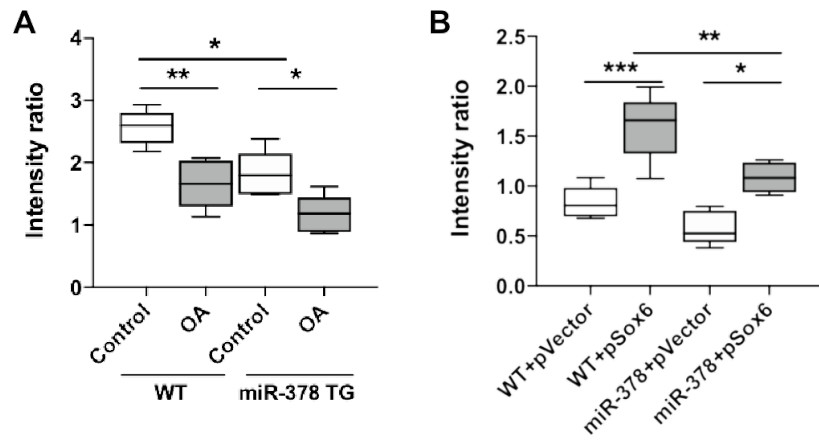

**Supplementary Figure 7. A&B.** Semi-quantitative analysis of cell fluorescence in Figure 3H (A) and 5K (B) (n=6; \*p<0.05, \*\*p<0.01, \*\*\*p<0.001).



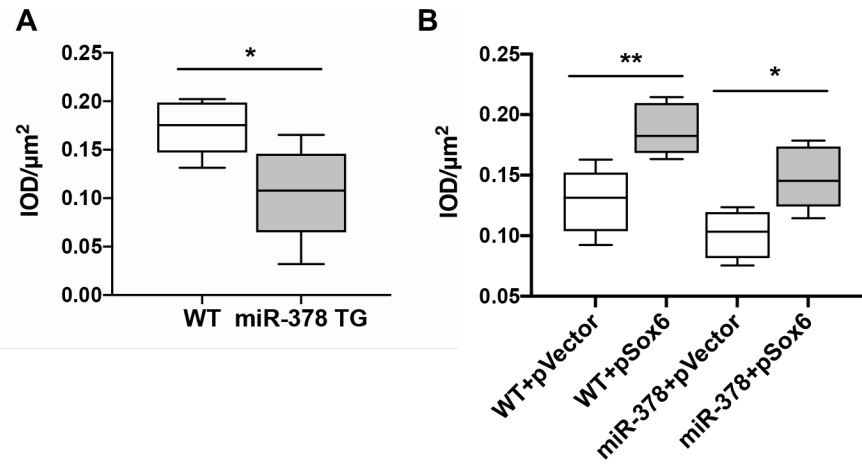

**Supplementary Figure 8. A&B.** Semi-quantitative analysis of IHC staining in Figure 4A (A) and 6I (B) (n=6; \*p<0.05, \*\*p<0.01).

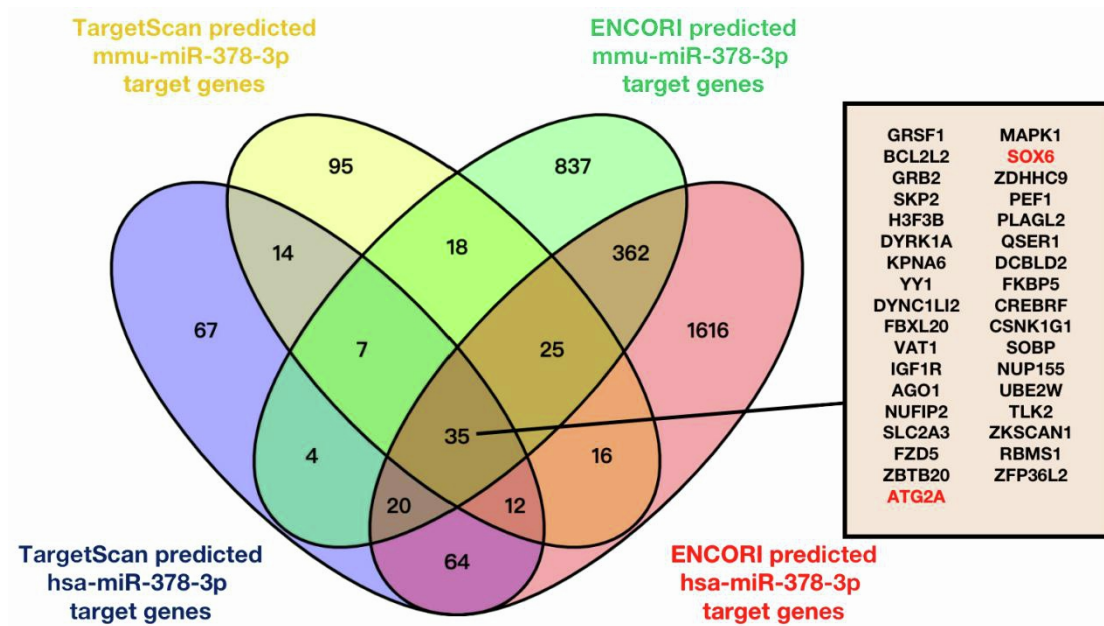

**Supplementary Figure 9.** Schematic diagram to show the miRNA target gene screening procedure. The TargetScan and ENCORI software were applied for *in silico* analysis of conserved 3'-UTR binding sites of miR-378 target genes respectively. The overlapped genes were listed.

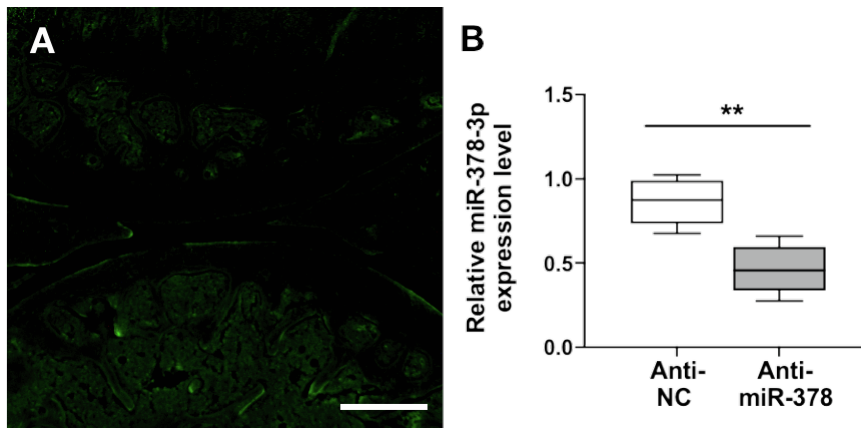

**Supplementary Figure 10. A.** The anti-miR-378-3p mediated lentivirus infected in articular cartilage 4 weeks after OA induction. Scale bar: 100  $\mu$ m. **B.** The miR-378-3p expression level in cartilage of miR-378 TG mice upon receiving anti-NC and anti-miR-378-3p lentivirus injection was detected by Real-time PCR analysis. The relative miRNA expression was normalized to mmu-miR-103a-3p (n=4; \*\*p<0.01).

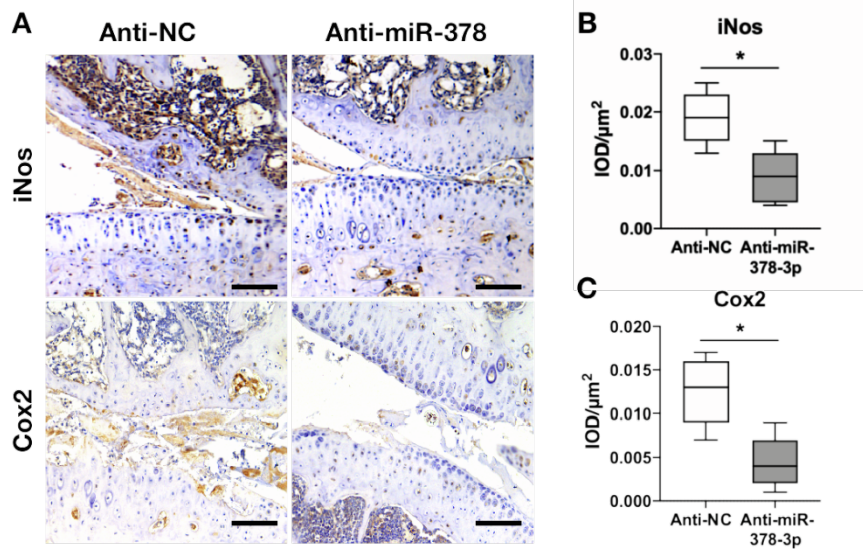

**Supplementary Figure 11.** IHC staining (A) and quantitative analysis of the percentage of iNos (B) and Cox2 (C) positive areas in articular cartilage from two group of mice at week 4 post ACLT+DMM surgery (n=8; \*p<0.05). Sections were counterstained with hematoxylin. Scale bars: 50  $\mu\text{m}$ .

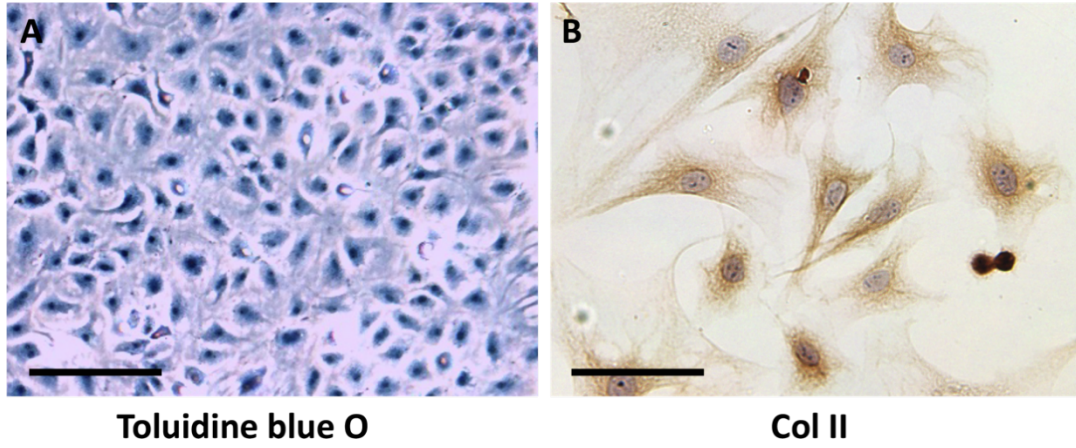

**Supplementary Figure 12. A&B.** Chondrocytes were characterized by Toluidine blue O staining (**A**) and IHC staining using Col II antibody (**B**). Scale bar: A, 100  $\mu\text{m}$ ; B, 50  $\mu\text{m}$ .

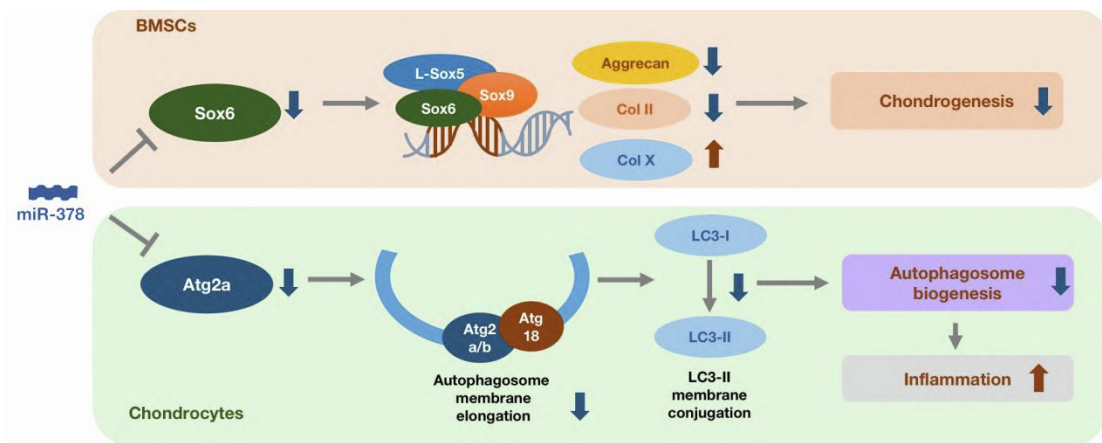

**Supplementary Figure 13.** Schematic diagram to show the regulation role of miR-378 on autophagy and chondrogenesis during OA progression.

**Supplementary Table 1. Primers used for vector construction and Real-time PCR assays**

| Primers for Real-time PCR |              |   |                            |     |
|---------------------------|--------------|---|----------------------------|-----|
| miNos                     | NM_010927    | F | CGAAACGCTTCACTTCCAA        | 51  |
|                           |              | R | TGAGCCTATATTGCTGTGGCT      |     |
| mCox2                     | NM_011198    | F | CAGACAACATAAACTGCGCCTT     | 71  |
|                           |              | R | GATACACCTCTCCACCAATGACC    |     |
| mBeclin-1                 | NM_019584    | F | TTTTCTGGACTGTGTGCAGC       | 171 |
|                           |              | R | GCTTTTGTCCACTGCTCCTC       |     |
| mAcan                     | NM_001361500 | F | CAACTATCCAGCCATCC          | 160 |
|                           |              | R | AATAGCTCTGTAGTGGAACA       |     |
| mSox9                     | NM_011448    | F | AGAAAGACCACCCCGATTACAAGT   | 209 |
|                           |              | R | CGGCGGACCCTGAGATTG         |     |
| mCol2a1                   | NM_031163    | F | AGAACAGCATCGCCTACCTG       | 161 |
|                           |              | R | CTTGCCCCACTTACCAGTGT       |     |
| mCol10a1                  | NM_009925    | F | CATCTCCCAGCACCAGAATC       | 152 |
|                           |              | R | GTGTCTTGGGGCTAGCAAGT       |     |
| mMmp13                    | NM_008607    | F | GCCATTTTCATGCTTCCTGAT      | 98  |
|                           |              | R | CTCTGGTGTTTTGGGATGCT       |     |
| mSox6                     | NM_011445    | F | TGCGACAGTTCTTCACTGTGG      | 195 |
|                           |              | R | CGTCCATCTTCATACCATACG      |     |
| mAtg2a                    | NM_194348    | F | CCAGCCTAGCAGCCAGTATC       | 331 |
|                           |              | R | CAGCAGAGCCTCTTGAGCTT       |     |
| mYwhaz                    | NM_0011740   | F | CAGTAGATGGAGAAAGATTTGC     | 92  |
|                           |              | R | GGGACAATTAGGGAAGTAAGT      |     |
| hSOX6                     | NM_017508    | F | TGAGGAGCTACCAACACTTGTC     | 121 |
|                           |              | R | TCGGAAGGAATATAGGGAACATAACT |     |
| hATG2A                    | NM_015104    | F | TGGCCATGGTCAAACCTGTGT      | 65  |
|                           |              | R | TGACCTAAGTAGTGGTGCAGCAA    |     |
| hYWHAZ                    | NM_003406    | F | ACCGTTACTTGGCTGAGGTTGC     | 130 |
|                           |              | R | CCCAGTCTGATAGGATGTGTTGG    |     |

“m” stands for “mouse”; “h” stands for “human”.
